# Supplementary material
Source: PubMed Central journal article supplement (PMC2819640)
Supplement: NIHMS161740-supplement-01.pdf [file NIHMS161740-supplement-01.pdf]

## Supplementary Data

### Fluorescence Calibration Curve with Z-duplex

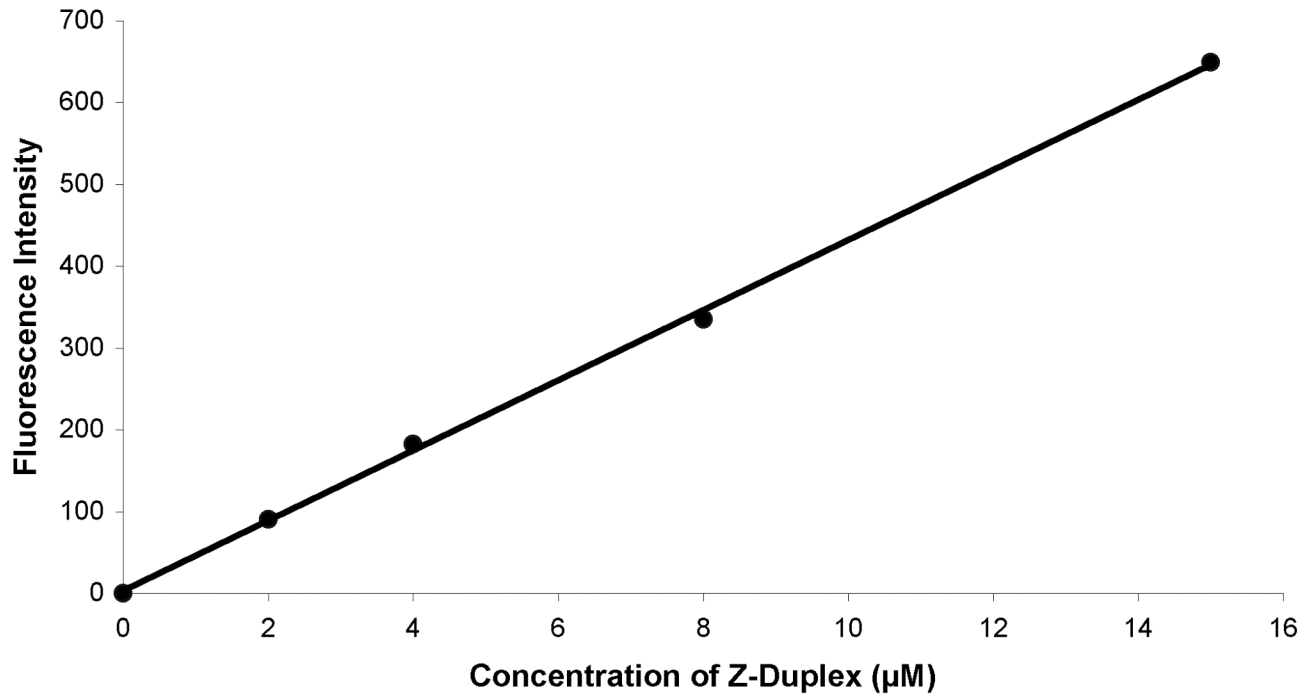

## Toxicity of Zebularine

| Strain | Relevant Genotype                       | Plasmid | Treatment | Average Cell Density (cfu/mL) | Percent Survival |
|--------|-----------------------------------------|---------|-----------|-------------------------------|------------------|
| GM30   | <i>dcm<sup>+</sup> mutL<sup>+</sup></i> | Vector  | None      | $(6.8 \pm 1.0) \times 10^8$   | (100%)           |
| GM30   | <i>dcm<sup>+</sup> mutL<sup>+</sup></i> | Vector  | Zeb       | $(1.7 \pm 0.2) \times 10^7$   | 2.4%             |
| GM30   | <i>dcm<sup>+</sup> mutL<sup>+</sup></i> | pDm-dNK | None      | $(4.4 \pm 0.6) \times 10^8$   | (100%)           |
| GM30   | <i>dcm<sup>+</sup> mutL<sup>+</sup></i> | pDm-dNK | Zeb       | $(8.5 \pm 1.4) \times 10^6$   | 1.9%             |
| GM31   | <i>dcm mutL<sup>+</sup></i>             | Vector  | None      | $(4.3 \pm 0.5) \times 10^8$   | (100%)           |
| GM31   | <i>dcm mutL<sup>+</sup></i>             | Vector  | Zeb       | $(5.1 \pm 0.2) \times 10^6$   | 1.2%             |
| GM31   | <i>dcm mutL<sup>+</sup></i>             | pDm-dNK | None      | $(4.2 \pm 0.7) \times 10^8$   | (100%)           |
| GM31   | <i>dcm mutL<sup>+</sup></i>             | pDm-dNK | Zeb       | $(7.6 \pm 0.2) \times 10^5$   | 0.18%            |
| BH256  | <i>dcm mutL</i>                         | Vector  | None      | $(4.9 \pm 0.3) \times 10^8$   | (100%)           |
| BH256  | <i>dcm mutL</i>                         | Vector  | Zeb       | $(2.8 \pm 0.1) \times 10^8$   | 58%              |
| BH256  | <i>dcm mutL</i>                         | pDm-dNK | None      | $(4.6 \pm 0.6) \times 10^8$   | (100%)           |
| BH256  | <i>dcm mutL</i>                         | pDm-dNK | Zeb       | $(2.7 \pm 0.0) \times 10^8$   | 59%              |
